# Supplementary material for: THE RELATIONSHIP BETWEEN ESTIMATED VO2MAX AND ABILITY TO PERFORM HIGH INCLINE TREADMILL WALKING
Source: MDPI journal article supplement (doi:10.3390/ijms22126370), 2014-01-01
Supplement: s1 [file s1]

**Supplementary information for:**

**Rapid conversion of amyloid-beta 1-40 oligomers to mature fibrils through a self-catalytic bimolecular process.**

**Bertrand Morel\*, Maria P. Carrasco, Samuel Jurado & Francisco Conejero-Lara\***

## Material and Methods

### *Bis-ANS fluorescence spectroscopy*

The fluorescence spectra of 10  $\mu\text{M}$  4,4'-Dianilino-1,1'-binaphthyl-5,5'-disulfonic acid (Bis-ANS) were recorded in the presence of A $\beta$  oligomers either freshly purified or incubated for 1 day. Spectra were measured between 400 nm and 600 nm upon excitation at 350 nm using a Varian Cary Eclipse spectrofluorimeter (Agilent Technologies, Santa Clara, CA) equipped with a Peltier-controlled thermostatic cell holder.

### *Attenuated total reflectance Fourier-transform infrared (ATR-FTIR) spectroscopy*

FTIR spectra were recorded at 37°C from 900 to 4000  $\text{cm}^{-1}$  on a Bruker IFS-66 FTIR spectrometer (Bruker, Ettlingen, Germany) equipped with a liquid N<sub>2</sub>-cooled MCT detector and a BioATR-II cell. For each sample, 128 interferograms were co-added and Fourier transformed with a zero filling factor of 4 to yield spectra with a nominal resolution of 2  $\text{cm}^{-1}$ . Buffer spectra were recorded under identical conditions and subtracted from the spectra of the protein sample. Spectral contributions from residual water vapor were reduced using the atmospheric compensation filter built in the Bruker OPUS software. In order to obtain secondary structure contents, the amide I band shape was fitted with a sum of Gaussian peaks using Origin 8.5 (OriginLab, Norhampton, MA). The positions of the amide I band components were identified using the minima obtained from the second derivative of each spectra.

### *Circular dichroism spectroscopy*

CD spectra were recorded in a Jasco J-715 spectropolarimeter (Jasco, Tokyo, Japan) equipped with Peltier-thermostatic cell holder. Measurements of the far-UV CD spectra (260–200 nm) were made with a 1 mm path length quartz cuvette at a protein concentration of  $\sim 80 \mu\text{M}$  in the case of LMW-A $\beta$ 40 and  $\sim 45 \mu\text{M}$  for p-A $\beta$ 40-OA. The resulting spectra were typically the average of 5 scans. Spectra were recorded at a scan rate of 100 nm/min, 1 nm step resolution, 1 s response, and 1 nm bandwidth. Each spectrum was corrected by baseline subtraction using the

blank spectrum obtained with the buffer and finally the CD signal was normalized to mean-residue molar ellipticity  $[\theta]$ , in  $\text{deg dmol}^{-1} \text{ cm}^2$ ).

#### *Mass spectrometry*

The molecular weights of the F10-A $\beta$ 40-OA and F10-LMW-A $\beta$ 40 at 8  $\mu\text{M}$  were performed by direct injection on a Synap G2 spectrometer (Waters) equipped with a quadrupole time of flight (Q-TOF) detector.

#### *Intrinsic and di-tyrosine fluorescence*

Tyrosine and dityrosine fluorescence spectroscopy experiments were performed using a Cary Eclipse Fluorescence Spectrophotometer (Varian Inc. Santa Clara, California, USA). For tyrosine fluorescence, the excitation wavelength was fixed to 280 nm and emission spectra were collected between 290 and 400 nm with slits width of 10 nm. Di-tyrosine fluorescence measurements were carried out using an excitation wavelength of 320 nm and spectra were collected from 340 nm to 500 nm using slits width of 10 nm.

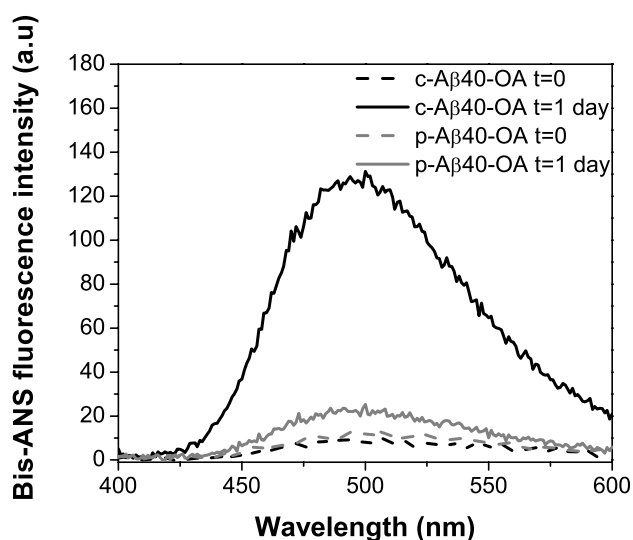

**Figure S1a.** Bis-ANS fluorescence scans of p-A $\beta$ 40-OA (grey) and c-A $\beta$ 40-OA oligomers (black) at 26  $\mu\text{M}$  are represented before (dashed lines) and after incubation at 37°C for 1 day (continuous lines).

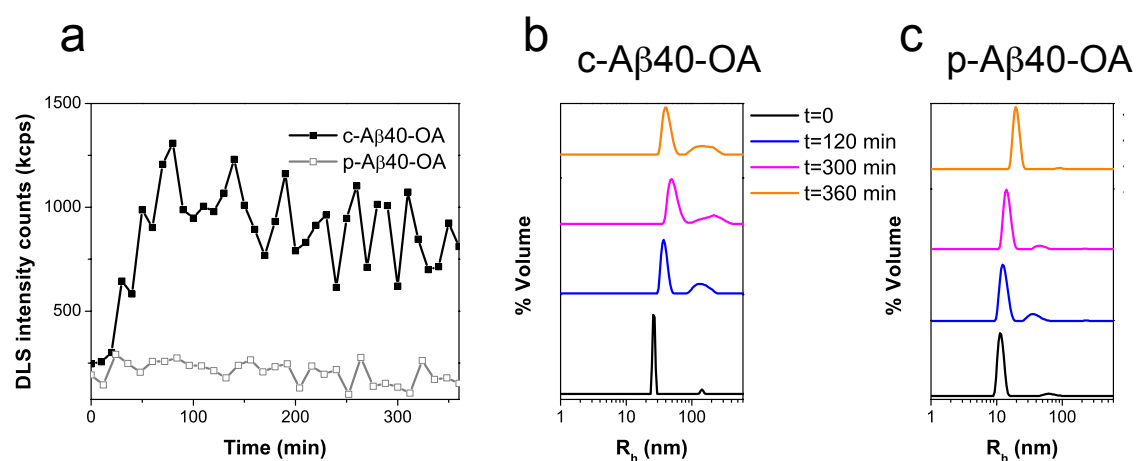

**Figure S2.** Aggregation time dependence of the different A $\beta$ 40 oligomer preparations followed by DLS. Variation of the scattering intensities as a function of the incubation time (a). Particle size distributions obtained by DLS for p-A $\beta$ 40-OA ( $c=25\ \mu\text{M}$ ) (b) and c-A $\beta$ 40-OA ( $c=25\ \mu\text{M}$ ) (c) freshly purified and during incubation at 37°C for different times.

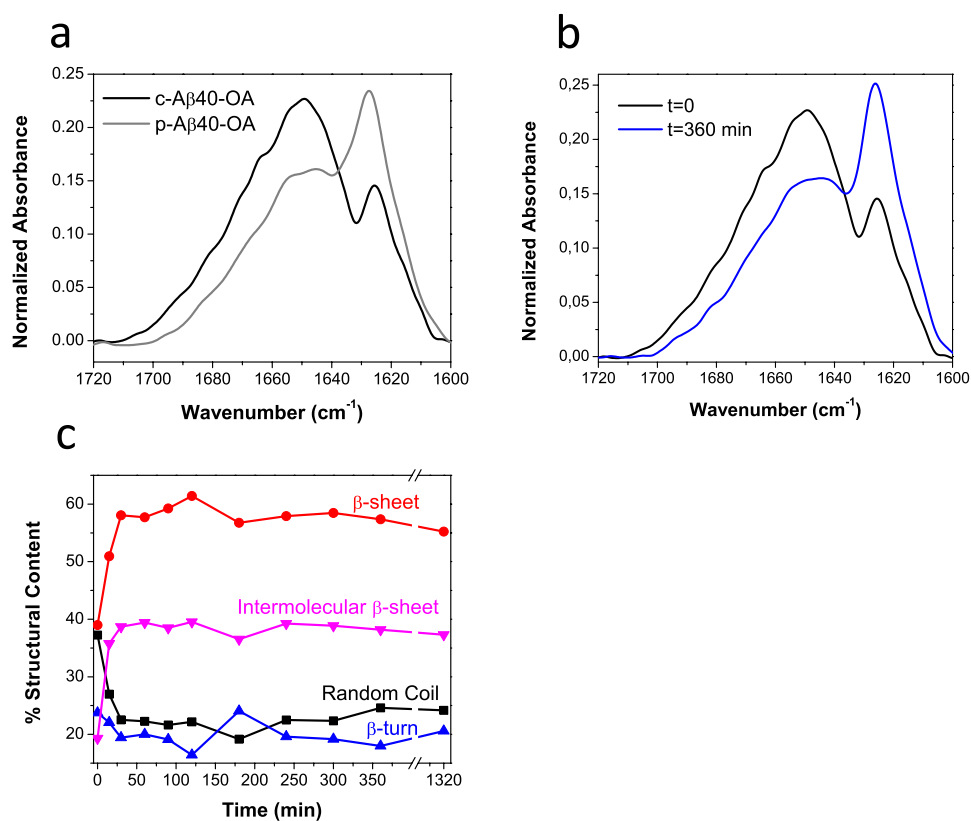

**Figure S3.** Changes of the secondary structure obtained by FTIR spectroscopy. Comparison of the FTIR spectra of p-A $\beta$ 40-OA (grey line) and c-A $\beta$ 40-OA (black line). Concentration of the samples was 25  $\mu\text{M}$  (a). Incubation effect on the secondary structure of c-A $\beta$ 40-OA followed by FTIR (b). Changes in the content of secondary structure of c-A $\beta$ 40-OA during incubation at 37°C followed by ATR-FTIR (c).

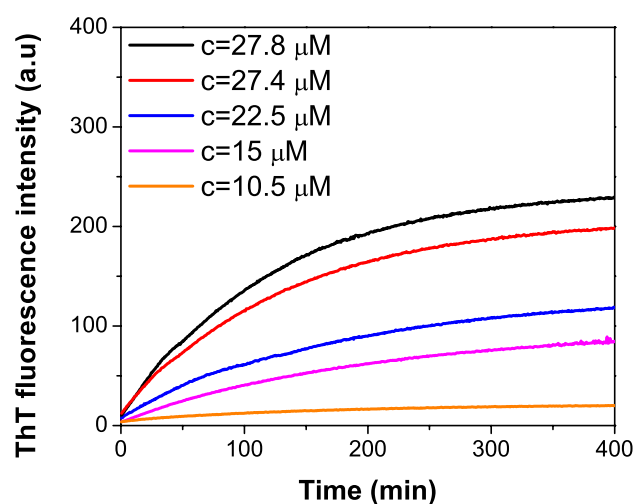

**Figure S4.** Concentration dependence of the aggregation kinetics of c-A $\beta$ 40-OA followed by ThT fluorescence at 37°C. Crude oligomers were prepared after incubation of LMW-A $\beta$ 40 for 4 hours. Oligomer concentrations are indicated in the graphs.

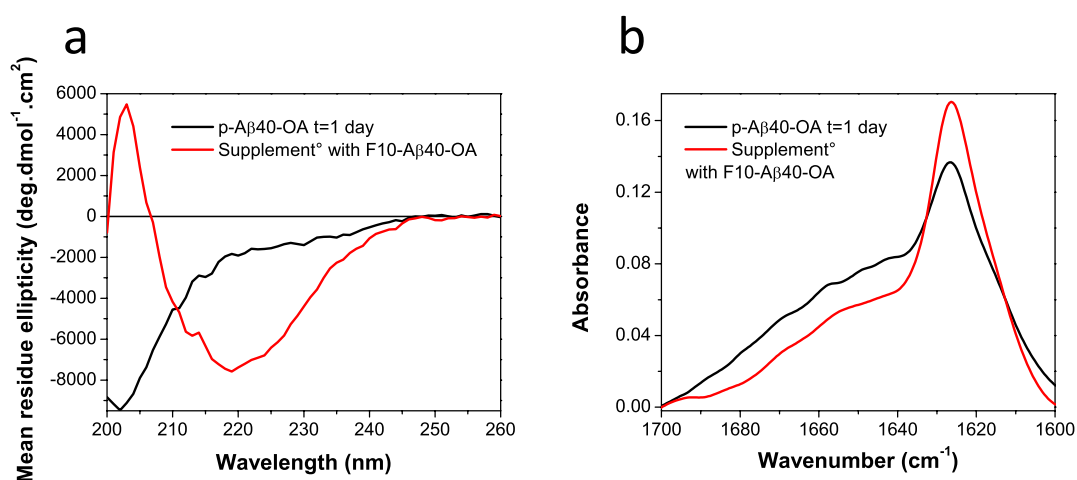

**Figure S5.** Effect of the supplementation with F10-A $\beta$ 40-OA on the secondary structure changes of p-A $\beta$ 40-OA at  $c=45 \mu\text{M}$  after overnight incubation followed by CD (a) and FTIR (b) spectroscopies. Samples were incubated at 37°C for about 360 minutes prior to supplementation with  $1.9 \mu\text{M}$  of F10-A $\beta$ 40-OA.

a

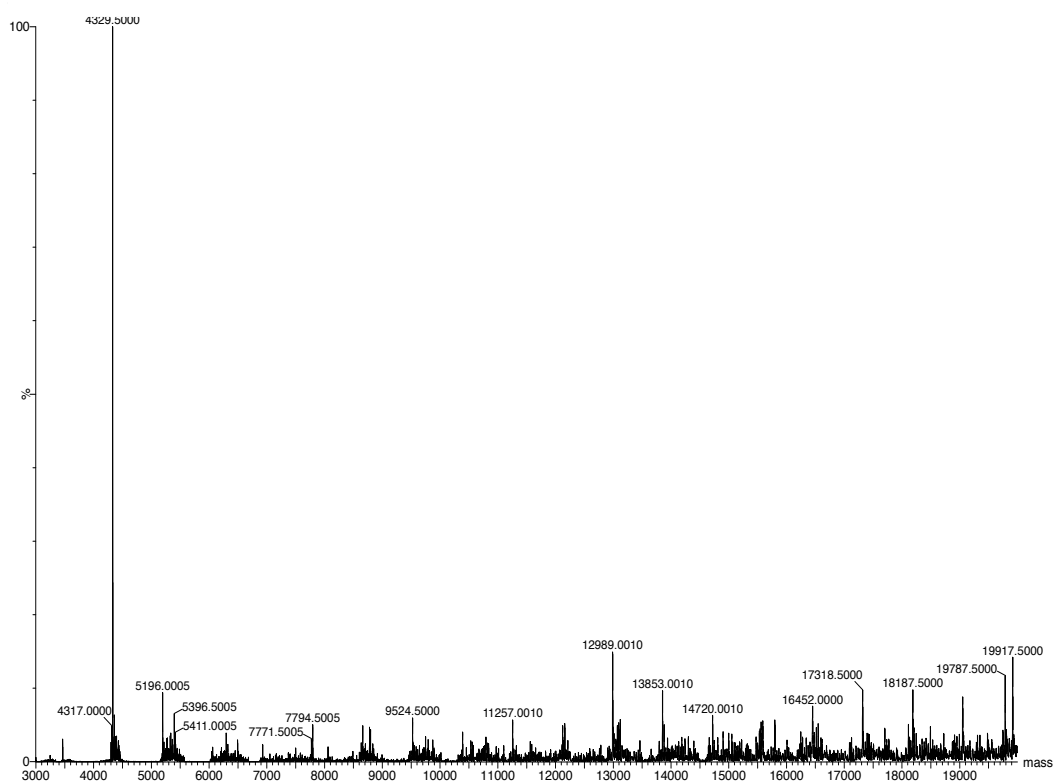

b

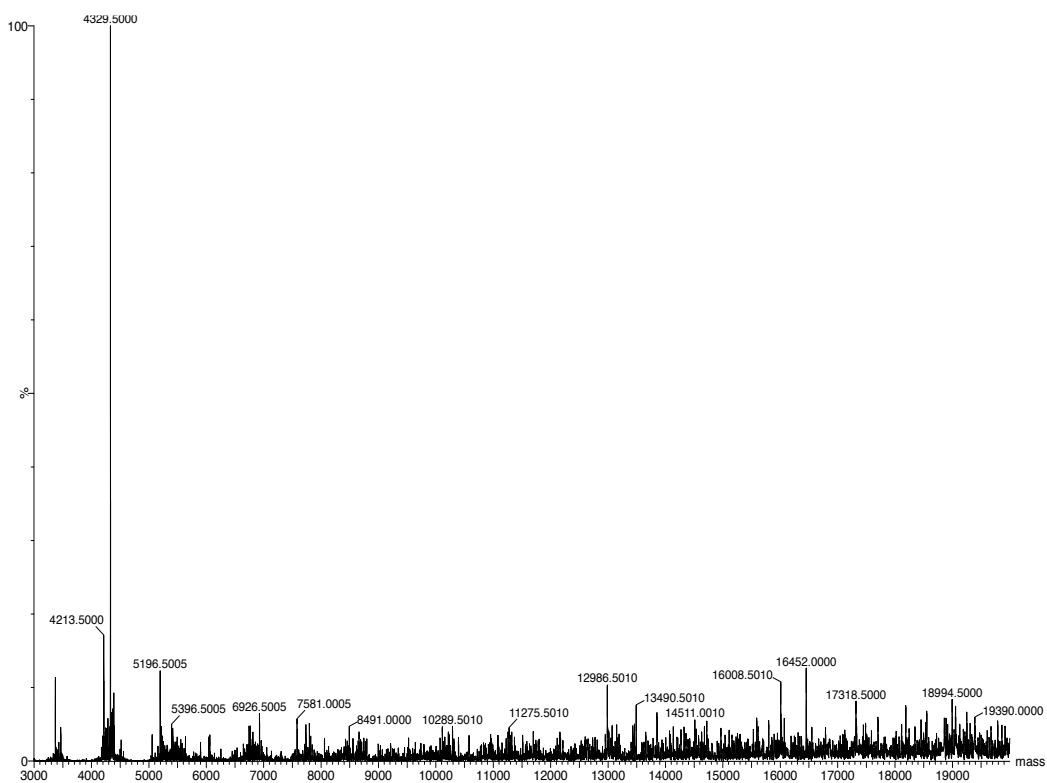

**Figure S6.** Mass spectra obtained from direct injection on Q-TOF ESI of F10-LMW-A $\beta$ 40 (a) and F10-A $\beta$ 40-OA (b) at 8  $\mu$ M.

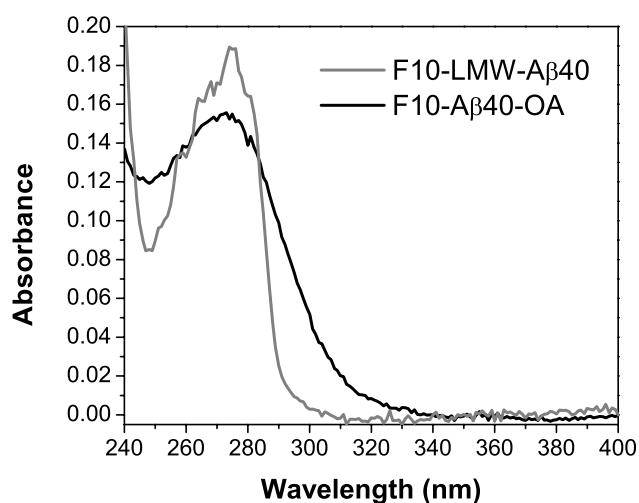

**Figure S7.** UV-vis spectra of F10-LMW-A $\beta$ 40 (grey line) and F10-A $\beta$ 40-OA (black line).

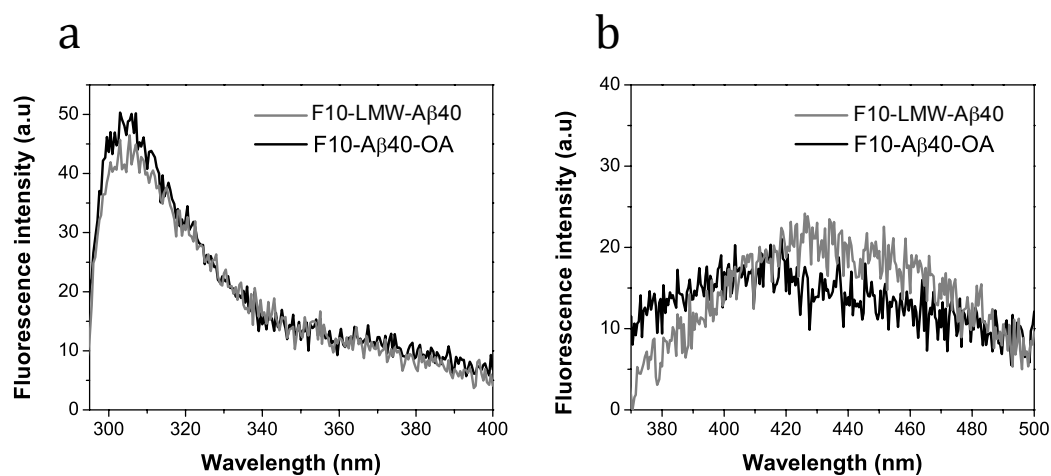

**Figure S8.** Intrinsic tyrosine (a) and dityrosine (b) fluorescence spectra of F10-LMW-A $\beta$ 40 (grey lines) and F10-A $\beta$ 40-OA (black lines) at 9.4  $\mu$ M.

**Table S1.** Secondary structure analysis of the oligomers derived from the deconvolution of the amide I regions of the FTIR spectra at t0 and after 400 min of incubation at 37°C.

|                                                 | c-A $\beta$ 40-OA |         | p-A $\beta$ 40-OA* |         |
|-------------------------------------------------|-------------------|---------|--------------------|---------|
|                                                 | 0                 | 400 min | 0                  | 400 min |
| Random Coil (%) <sup>a</sup>                    | 37.3              | 26.2    | 15.9               | -       |
| $\beta$ -sheets (%) <sup>b</sup>                | 39                | 59.2    | 44.0               | 72.9    |
| $\beta$ -turns (%) <sup>c</sup>                 | 23.7              | 14.6    | 40.1               | 27.1    |
| Intermolecular $\beta$ -sheets (%) <sup>d</sup> | 19.3              | 38.0    | 37.3               | 46.7    |

\* data taken from <sup>1</sup>.

\*\* Characteristics Amide I wavenumbers obtained from <sup>2</sup>

a: Random coil : 1645 cm<sup>-1</sup> – 1655 cm<sup>-1</sup>

b:  $\beta$ -sheet : 1620 cm<sup>-1</sup> - 1640 cm<sup>-1</sup>; 1670 cm<sup>-1</sup> - 1695 cm<sup>-1</sup>

c:  $\beta$ -turns : 1685 cm<sup>-1</sup> - 1655 cm<sup>-1</sup>

d: Intermolecular  $\beta$ -sheet : 1627 cm<sup>-1</sup> - 1615 cm<sup>-1</sup>

## References

1. B. Morel, M. P. Carrasco, S. Jurado, C. Marco and F. Conejero-Lara, *Phys. Chem. Chem. Phys.*, 2018, **20**, 20597-20614.
2. S. A. Tatulian, *Methods Mol. Biol.*, 2013, **974**, 177-218.
